# Supplementary material for: Untargeted Metabolomics Analysis of the Serum Metabolic Signature of Childhood Obesity
Source: MDPI journal article supplement (doi:10.3390/nu14010214), 2022-01-04
Supplement: s1 [file s1]

**Supplementary Figure S1. Heatmap of Pearson correlation coefficient matrix between selected metabolites and clinical variables.** Red and blue indicate negative and positive correlations, respectively. Color intensity indicates the absolute correlation value. Empty cells indicate non-significant correlations (adjusted  $p$ -values  $> 0.05$ ). SM – sphingomyelin; PC – Phosphatidylcholine; CE - cholesteryl ester; TG 58:8 – Triacylglycerol 58:8; 9,10-EpOME - 9,10-Epoxyoctadecenoic acid; BMI – body mass index; TG – total triglycerides; HDL - high-density lipoprotein cholesterol; LDL - low-density lipoprotein cholesterol; TSH - Thyroid-Stimulating Hormone; SBP – systolic blood pressure; DBP – diastolic blood pressure.

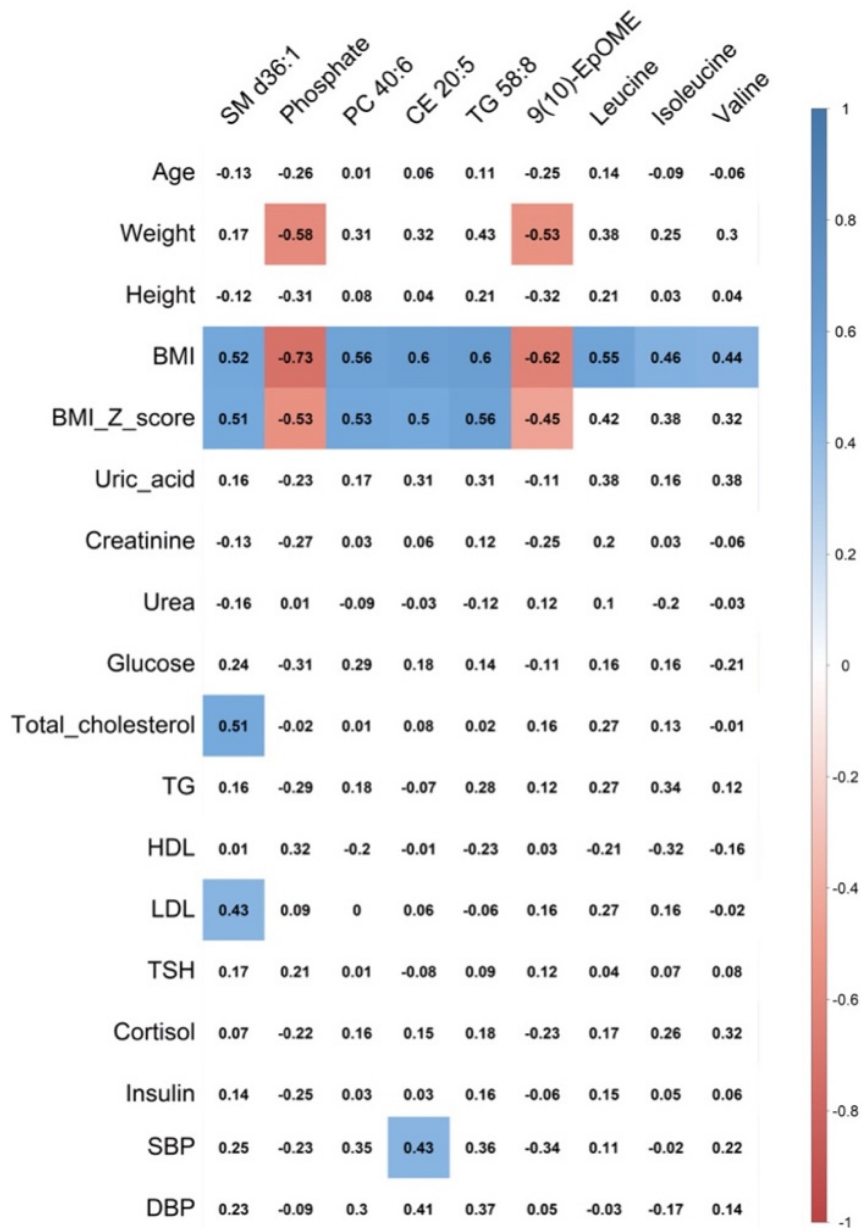

**Supplementary Table S1. List of metabolites significantly differentially expressed between obesity and control groups.** Presented are metabolites for which the unadjusted *p*-value was <0.05, with the fold change (FC), log2 fold change (log2(FC)), *p*-value and adjusted *p*-value (adj. *p*-value). Multiple testing correction was done using the False Discovery Rate method. The FC was calculated by dividing the metabolite concentration in the obesity group by the concentration in the control group. SM – sphingomyelin; PC – Phosphatidylcholine; PI – Phosphatidylinositol; CE - cholesteryl ester; TG – Triacylglycerol; 9,10-EpOME - 9,10-Epoxyoctadecenoic acid; LPC – Lysophosphatidylcholine; FA – fatty acid; Cer – ceramide; G-Glu-Glu - gamma-Glutamyl-glutamic acid.

| Metabolite name        | FC   | log2(FC) | <i>p</i> -value | adj. <i>p</i> -value |
|------------------------|------|----------|-----------------|----------------------|
| phosphate              | 0.74 | -0.43    | 6.73E-07        | 0.0002               |
| SM d36:1               | 1.56 | 0.64     | 5.54E-07        | 0.0002               |
| CE 22:6                | 2.05 | 1.03     | 1.09E-05        | 0.0015               |
| CE 20:5                | 2.30 | 1.20     | 8.46E-06        | 0.0015               |
| PC 40:6                | 2.16 | 1.11     | 3.25E-05        | 0.0035               |
| 9(10)-EpOME            | 0.54 | -0.88    | 8.83E-05        | 0.0076               |
| Phenylalanine          | 1.38 | 0.46     | 0.0001          | 0.0076               |
| PC 36:4.1              | 1.38 | 0.46     | 0.0001          | 0.0076               |
| Glutamine              | 1.46 | 0.54     | 0.0001          | 0.0076               |
| PI 38:4 PI 18:0_20:4   | 1.51 | 0.59     | 0.0001          | 0.0076               |
| PC 38:4                | 1.65 | 0.72     | 0.0002          | 0.0076               |
| PC 36:4                | 1.75 | 0.80     | 0.0002          | 0.0076               |
| PC P-38:4 or PC O-38:5 | 1.83 | 0.87     | 0.0002          | 0.0076               |
| TG 58:8                | 2.40 | 1.27     | 0.0002          | 0.0076               |
| PC 40:6.1              | 1.71 | 0.77     | 0.0003          | 0.0098               |
| Leucine                | 1.23 | 0.30     | 0.0005          | 0.0118               |
| beta-Alanine           | 1.24 | 0.31     | 0.0004          | 0.0118               |
| alanine                | 1.43 | 0.52     | 0.0005          | 0.0118               |
| PC 38:5                | 1.66 | 0.73     | 0.0004          | 0.0118               |
| PC 40:5                | 1.76 | 0.82     | 0.0005          | 0.0118               |
| PC 40:7                | 1.88 | 0.91     | 0.0005          | 0.0118               |
| PC P-40:6 or PC O-40:7 | 1.94 | 0.95     | 0.0004          | 0.0118               |
| valine                 | 1.17 | 0.23     | 0.0006          | 0.0124               |
| PC 40:5.1              | 1.39 | 0.47     | 0.0006          | 0.0124               |
| PC 36:5                | 1.67 | 0.74     | 0.0006          | 0.0124               |
| PC P-38:5 or PC O-38:6 | 1.69 | 0.76     | 0.0007          | 0.0148               |

|                            |      |       |        |        |
|----------------------------|------|-------|--------|--------|
| PC P-40:4 or PC O-40:5.1   | 1.61 | 0.69  | 0.0008 | 0.0154 |
| PC 35:4.1                  | 1.62 | 0.69  | 0.0008 | 0.0154 |
| Retinoic acid              | 1.28 | 0.36  | 0.0009 | 0.0169 |
| PC 38:5.1                  | 1.34 | 0.42  | 0.0010 | 0.0175 |
| PE P-40:6 or PE O-40:7     | 1.45 | 0.53  | 0.0010 | 0.0175 |
| Isoleucine                 | 1.21 | 0.28  | 0.0012 | 0.0186 |
| PC P-38:4 or PC O-38:5.1   | 1.45 | 0.53  | 0.0012 | 0.0186 |
| PC 40:4                    | 1.49 | 0.57  | 0.0012 | 0.0186 |
| PC 37:4                    | 1.58 | 0.66  | 0.0012 | 0.0186 |
| TG 58:9                    | 2.25 | 1.17  | 0.0012 | 0.0186 |
| Methionine                 | 1.87 | 0.90  | 0.0014 | 0.0202 |
| PC 34:4                    | 1.63 | 0.71  | 0.0015 | 0.0218 |
| Lysine                     | 1.25 | 0.32  | 0.0016 | 0.0223 |
| SM d36:2                   | 1.30 | 0.37  | 0.0017 | 0.0229 |
| Androstane-3,17-diol       | 0.75 | -0.41 | 0.0019 | 0.0238 |
| TG 56:5                    | 1.89 | 0.92  | 0.0019 | 0.0238 |
| TG 56:7                    | 2.13 | 1.09  | 0.0019 | 0.0238 |
| PC 36:2;2O PC 18:0_18:2;2O | 0.66 | -0.60 | 0.0021 | 0.0244 |
| PE P-40:5 or PE O-40:6     | 1.44 | 0.53  | 0.0021 | 0.0244 |
| PC 36:6                    | 1.81 | 0.85  | 0.0021 | 0.0244 |
| Serine                     | 1.20 | 0.26  | 0.0022 | 0.0250 |
| PE P-36:4 or PE O-36:5     | 1.73 | 0.79  | 0.0024 | 0.0262 |
| PC O-36:5                  | 1.60 | 0.67  | 0.0025 | 0.0263 |
| TG 54:5                    | 2.01 | 1.01  | 0.0025 | 0.0263 |
| SM d36:0.1                 | 1.65 | 0.73  | 0.0027 | 0.0271 |
| PC 37:4.1                  | 1.43 | 0.51  | 0.0028 | 0.0273 |
| PI 36:4 PI 16:0_20:4       | 1.56 | 0.64  | 0.0028 | 0.0273 |
| DG 36:3                    | 1.45 | 0.53  | 0.0029 | 0.0274 |
| PC P-38:5 or PC O-38:6.1   | 2.04 | 1.03  | 0.0029 | 0.0274 |
| PE P-36:4 or PE O-36:5.1   | 1.63 | 0.70  | 0.0030 | 0.0282 |
| threonic acid              | 1.31 | 0.39  | 0.0032 | 0.0284 |
| SM d36:0                   | 1.37 | 0.45  | 0.0031 | 0.0284 |
| Cholesterol                | 0.95 | -0.08 | 0.0035 | 0.0305 |
| TG 54:4                    | 1.62 | 0.69  | 0.0036 | 0.0314 |
| SM 36:2;2O SM 18:2;2O/18:0 | 1.32 | 0.40  | 0.0039 | 0.0332 |
| TG 58:6                    | 1.69 | 0.76  | 0.0039 | 0.0332 |
| Ornithine                  | 1.14 | 0.19  | 0.0044 | 0.0351 |
| PE 38:6.1                  | 1.61 | 0.69  | 0.0043 | 0.0351 |
| TG 54:6                    | 1.82 | 0.86  | 0.0043 | 0.0351 |

|                          |      |       |        |        |
|--------------------------|------|-------|--------|--------|
| TG 56:8                  | 1.88 | 0.91  | 0.0045 | 0.0359 |
| Cer d36:1.1              | 1.26 | 0.34  | 0.0052 | 0.0409 |
| FA 22:1 (erucic acid)    | 0.76 | -0.40 | 0.0060 | 0.0444 |
| LPC O-16:1               | 0.82 | -0.28 | 0.0060 | 0.0444 |
| SM d38:2.1               | 1.19 | 0.25  | 0.0058 | 0.0444 |
| PC P-40:7 or PC O-40:8   | 1.44 | 0.53  | 0.0059 | 0.0444 |
| PC 38:3.1                | 1.36 | 0.44  | 0.0065 | 0.0469 |
| PC 36:5.1                | 1.44 | 0.53  | 0.0065 | 0.0469 |
| SM d30:1.1               | 1.29 | 0.37  | 0.0070 | 0.0477 |
| Homoarginine             | 1.33 | 0.41  | 0.0071 | 0.0477 |
| PC 40:4.1                | 1.34 | 0.42  | 0.0071 | 0.0477 |
| TG 53:5                  | 1.60 | 0.68  | 0.0070 | 0.0477 |
| TG 52:5                  | 1.61 | 0.69  | 0.0069 | 0.0477 |
| PC P-44:4 or PC O-44:5.1 | 1.35 | 0.43  | 0.0072 | 0.0477 |
| PC 39:6                  | 2.00 | 1.00  | 0.0073 | 0.0477 |
| TG 53:4                  | 1.69 | 0.75  | 0.0076 | 0.0495 |
| PC P-40:4 or PC O-40:5   | 1.41 | 0.50  | 0.0079 | 0.0499 |
| PC 38:6                  | 1.45 | 0.54  | 0.0079 | 0.0499 |
| Cer d40:2                | 1.26 | 0.33  | 0.0083 | 0.0518 |
| His-Val                  | 1.36 | 0.44  | 0.0090 | 0.0522 |
| LPC O-16:0               | 0.79 | -0.34 | 0.0090 | 0.0522 |
| PC P-40:5 or PC O-40:6   | 1.39 | 0.48  | 0.0090 | 0.0522 |
| PI 38:3 PI 18:0_20:3     | 1.42 | 0.50  | 0.0090 | 0.0522 |
| TG 51:3                  | 1.51 | 0.59  | 0.0086 | 0.0522 |
| TG 53:2                  | 1.44 | 0.53  | 0.0089 | 0.0522 |
| TG 53:3                  | 1.54 | 0.62  | 0.0089 | 0.0522 |
| SM d37:1                 | 1.25 | 0.32  | 0.0093 | 0.0536 |
| Hippuric acid            | 0.76 | -0.39 | 0.0097 | 0.0547 |
| PE P-38:5 or PE O-38:6.1 | 1.48 | 0.57  | 0.0097 | 0.0547 |
| Cer d32:1                | 1.32 | 0.40  | 0.0105 | 0.0562 |
| PC 37:6                  | 1.44 | 0.53  | 0.0105 | 0.0562 |
| PC P-36:3 or PC O-36:4.1 | 1.30 | 0.38  | 0.0105 | 0.0562 |
| PC P-42:5 or PC O-42:6   | 1.46 | 0.54  | 0.0105 | 0.0562 |
| SM d32:1.1               | 1.28 | 0.35  | 0.0102 | 0.0562 |
| PC O-34:5                | 0.82 | -0.29 | 0.0111 | 0.0579 |
| PC P-36:4 or PC O-36:5   | 1.56 | 0.64  | 0.0111 | 0.0579 |
| DG 34:2                  | 1.32 | 0.40  | 0.0117 | 0.0606 |
| G-Glu-Glu                | 0.83 | -0.26 | 0.0118 | 0.0607 |
| Nicotinamide             | 1.39 | 0.47  | 0.0122 | 0.0615 |

|                           |      |       |        |        |
|---------------------------|------|-------|--------|--------|
| PC 37:3                   | 1.21 | 0.28  | 0.0122 | 0.0615 |
| aspartic acid             | 1.34 | 0.42  | 0.0130 | 0.0622 |
| Cer d42:2.1               | 1.21 | 0.27  | 0.0133 | 0.0622 |
| γ-Glutamylleucine         | 0.88 | -0.19 | 0.0133 | 0.0622 |
| PC 34:2;2O PC16:0_18:2;2O | 0.72 | -0.47 | 0.0130 | 0.0622 |
| PC 34:4.1                 | 1.46 | 0.55  | 0.0132 | 0.0622 |
| PE 38:6                   | 1.54 | 0.62  | 0.0131 | 0.0622 |
| PE P-38:5 or PE O-38:6    | 1.53 | 0.61  | 0.0130 | 0.0622 |
| TG 50:5                   | 1.79 | 0.84  | 0.0132 | 0.0622 |
| Phe-Phe                   | 1.89 | 0.92  | 0.0143 | 0.0664 |
| TG 52:4                   | 1.48 | 0.56  | 0.0154 | 0.0710 |
| Cer d42:2                 | 1.20 | 0.26  | 0.0166 | 0.0751 |
| PC P-44:4 or PC O-44:5    | 1.36 | 0.44  | 0.0166 | 0.0751 |
| CE 20:4                   | 1.30 | 0.38  | 0.0177 | 0.0789 |
| Cer d39:1                 | 1.25 | 0.32  | 0.0178 | 0.0789 |
| PC P-36:3 or PC O-36:4    | 1.44 | 0.53  | 0.0179 | 0.0789 |
| TG 50:4 TG 14:1_18:1_18:2 | 1.45 | 0.54  | 0.0185 | 0.0810 |
| PE 38:4.1                 | 1.39 | 0.47  | 0.0192 | 0.0834 |
| glutamyl-valine           | 0.82 | -0.28 | 0.0207 | 0.0876 |
| PC P-42:4 or PC O-42:5    | 1.32 | 0.40  | 0.0207 | 0.0876 |
| PE 38:4                   | 1.67 | 0.74  | 0.0207 | 0.0876 |
| SM d36:3                  | 1.20 | 0.26  | 0.0209 | 0.0880 |
| SM d32:0                  | 1.23 | 0.30  | 0.0213 | 0.0885 |
| TG 51:2                   | 1.40 | 0.48  | 0.0214 | 0.0885 |
| Ala-Leu                   | 1.49 | 0.58  | 0.0225 | 0.0927 |
| maleimide                 | 1.24 | 0.31  | 0.0237 | 0.0968 |
| PC 38:4 PC 18:1_20:3      | 1.30 | 0.38  | 0.0243 | 0.0977 |
| PC P-38:3 or PC O-38:4    | 1.35 | 0.43  | 0.0243 | 0.0977 |
| PC 16:0                   | 0.81 | -0.30 | 0.0255 | 0.1003 |
| SM d38:1                  | 1.17 | 0.22  | 0.0255 | 0.1003 |
| TG 56:4                   | 1.36 | 0.44  | 0.0255 | 0.1003 |
| 2-hydroxybutanoic acid    | 1.25 | 0.32  | 0.0264 | 0.1031 |
| Gly-Val                   | 1.47 | 0.56  | 0.0274 | 0.1039 |
| Meprobamate               | 0.79 | -0.35 | 0.0272 | 0.1039 |
| PE P-40:4 or PE O-40:5    | 1.17 | 0.23  | 0.0274 | 0.1039 |
| TG 49:2                   | 1.52 | 0.61  | 0.0273 | 0.1039 |
| TG 56:6                   | 1.54 | 0.62  | 0.0291 | 0.1097 |
| PC O-44:6                 | 1.40 | 0.48  | 0.0314 | 0.1167 |
| PE P-38:4 or PE O-38:5    | 1.41 | 0.50  | 0.0314 | 0.1167 |

|                          |      |       |        |        |
|--------------------------|------|-------|--------|--------|
| TG 52:3                  | 1.33 | 0.41  | 0.0324 | 0.1198 |
| SM d39:2                 | 1.21 | 0.28  | 0.0335 | 0.1230 |
| asparagine               | 1.18 | 0.24  | 0.0358 | 0.1297 |
| cysteine                 | 1.23 | 0.29  | 0.0358 | 0.1297 |
| glycolic acid            | 0.87 | -0.20 | 0.0384 | 0.1318 |
| LPE O-16:1               | 0.85 | -0.23 | 0.0373 | 0.1318 |
| Pantothenic acid         | 1.19 | 0.25  | 0.0383 | 0.1318 |
| SM d32:2                 | 1.31 | 0.39  | 0.0384 | 0.1318 |
| TG 54:3                  | 1.27 | 0.34  | 0.0384 | 0.1318 |
| Tyrosine                 | 1.16 | 0.21  | 0.0373 | 0.1318 |
| tyrosine                 | 1.14 | 0.19  | 0.0384 | 0.1318 |
| DL-Octopamine            | 1.13 | 0.18  | 0.0410 | 0.1398 |
| Histidine                | 1.11 | 0.15  | 0.0420 | 0.1425 |
| CE 16:1                  | 1.22 | 0.29  | 0.0451 | 0.1519 |
| citric acid              | 0.85 | -0.24 | 0.0458 | 0.1532 |
| TG 49:3                  | 1.58 | 0.66  | 0.0481 | 0.1600 |
| taurine                  | 1.58 | 0.66  | 0.0485 | 0.1605 |
| PC 34:3                  | 1.21 | 0.28  | 0.0489 | 0.1607 |
| PC P-34:1 or PC O-34:2.1 | 0.85 | -0.24 | 0.0497 | 0.1623 |

**Supplementary Table S2. ROC Area under the Curve (AUC) for each metabolite to evaluate their ability to predict patient groups.** *Univariate ROC curve analysis was done for each metabolite. Presented are the AUC values for each metabolite. SM – sphingomyelin; PC – Phosphatidylcholine; PI – Phosphatidylinositol; CE - cholesteryl ester; TG – Triacylglycerol; 9,10-EpOME - 9,10-Epoxyoctadecenoic acid; LPC – Lysophosphatidylcholine; FA – fatty acid; Cer – ceramide; G-Glu-Glu - gamma-Glutamyl-glutamic acid.*

| <i>Metabolite name</i>   | <i>AUC</i> | <i>Metabolite name</i>     | <i>AUC</i> | <i>Metabolite name</i>       | <i>AUC</i> |
|--------------------------|------------|----------------------------|------------|------------------------------|------------|
| phosphate                | 0.972      | indole-3-acetate           | 0.677      | Urocanic acid                | 0.577      |
| SM d36:1                 | 0.928      | TG 48:3                    | 0.676      | xylose                       | 0.577      |
| CE 20:5                  | 0.923      | histidine                  | 0.674      | PC 32:1                      | 0.577      |
| CE 22:6                  | 0.918      | LPC 20:1                   | 0.673      | FA 22:2 (docosadienoic acid) | 0.577      |
| PC 40:6                  | 0.895      | SM d39:1                   | 0.672      | succinic acid                | 0.576      |
| 9(10)-EpOME              | 0.872      | 2-aminobutyric acid        | 0.672      | LPC 18:3                     | 0.576      |
| Glutamine                | 0.862      | PC P-36:4 or PC O-36:5.1   | 0.672      | PC P-32:0 or PC O-32:1.1     | 0.576      |
| PI 38:4 PI 18:0_20:4     | 0.862      | PC P-36:2 or PC O-36:3     | 0.672      | SM d42:1                     | 0.574      |
| PC 36:4                  | 0.854      | myo-inositol               | 0.669      | Lenticin                     | 0.574      |
| Phenylalanine            | 0.846      | ethanolamine               | 0.669      | GlcCer d42:2.1               | 0.574      |
| PC 40:6.1                | 0.846      | SM d43:2                   | 0.667      | GlcCer d40:1.1               | 0.574      |
| PC 36:4.1                | 0.846      | LPC 20:1.1                 | 0.667      | Acetylcarnitine              | 0.574      |
| PC P-38:4 or PC O-38:5   | 0.841      | FA 20:4 (arachidonic acid) | 0.667      | ST 27:1;O;S                  | 0.574      |
| TG 58:8                  | 0.838      | PC 32:2                    | 0.667      | H-γ-glutamyl-glutamine       | 0.574      |
| PC 38:4                  | 0.838      | SM d41:1                   | 0.665      | Betonicine                   | 0.573      |
| PC P-40:6 or PC O-40:7   | 0.836      | SM d43:1                   | 0.665      | 5'-Methylthioadenosine       | 0.572      |
| PC 38:5                  | 0.836      | PE 36:4                    | 0.664      | PC O-34:0                    | 0.569      |
| PC 40:5                  | 0.833      | SM d30:1                   | 0.664      | 3-aminoisobutyric acid       | 0.569      |
| PC 40:7                  | 0.833      | TG 49:1                    | 0.664      | Stachydrine                  | 0.569      |
| alanine                  | 0.832      | palmitoleic acid           | 0.664      | 3-Dehydrocarnitine           | 0.569      |
| Leucine                  | 0.832      | Threonine                  | 0.664      | PC 34:2.1                    | 0.569      |
| PC 36:5                  | 0.828      | Cotinine                   | 0.664      | PC 36:1.1                    | 0.569      |
| PC 40:5.1                | 0.828      | SM 40:1;2O                 | 0.664      | mannose                      | 0.569      |
| valine                   | 0.827      | 1H-Imidazole               | 0.664      | PC 37:2.1                    | 0.567      |
| beta-Alanine             | 0.823      | PC P-42:4 or PC O-42:5.1   | 0.663      | 2-Methylbutyryl-L-carnitine  | 0.567      |
| Retinoic acid            | 0.815      | fucose                     | 0.663      | FA 20:3                      | 0.567      |
| PE P-40:6 or PE O-40:7   | 0.813      | TG 56:3                    | 0.662      | TG 46:1                      | 0.564      |
| PC 38:5.1                | 0.813      | trans-4-hydroxyproline     | 0.662      | 3-Methylhistidine            | 0.564      |
| PC P-38:5 or PC O-38:6   | 0.810      | DG 34:1                    | 0.660      | FA 22:4                      | 0.564      |
| PC 35:4.1                | 0.808      | TG 51:1                    | 0.660      | FA 16:1 (palmitoleic acid)   | 0.564      |
| PC P-40:4 or PC O-40:5.1 | 0.808      | PC 38:3                    | 0.659      | FA 19:1                      | 0.564      |

|                            |       |                               |       |                               |       |
|----------------------------|-------|-------------------------------|-------|-------------------------------|-------|
| TG 58:9                    | 0.808 | DG 36:2                       | 0.659 | PC 32:0                       | 0.563 |
| Isoleucine                 | 0.808 | TG 58:4                       | 0.659 | glycerol                      | 0.563 |
| PC 40:4                    | 0.808 | SM d34:0.1                    | 0.659 | Cer d34:1.1                   | 0.562 |
| PC 37:4                    | 0.808 | lyxitol                       | 0.658 | LPC 22:4                      | 0.560 |
| Methionine                 | 0.804 | TG 52:6                       | 0.658 | maltose                       | 0.560 |
| Lysine                     | 0.800 | CE 18:3                       | 0.656 | 9-myristoleate                | 0.560 |
| PC P-38:4 or PC O-38:5.1   | 0.797 | PE P-34:1 or PE O-34:2.1      | 0.656 | FA 14:0 (myristic acid)       | 0.560 |
| TG 56:7                    | 0.795 | LPC 20:2.1                    | 0.656 | TG 46:2                       | 0.559 |
| TG 56:5                    | 0.795 | SM d39:2.1                    | 0.656 | methanolphosphate             | 0.559 |
| Androstane-3,17-diol       | 0.795 | acylcarnitine 14:2            | 0.656 | LPC 14:0.1                    | 0.559 |
| PE P-40:5 or PE O-40:6     | 0.792 | LPC 18:0.1                    | 0.656 | Cer d34:0.1                   | 0.556 |
| PC 36:6                    | 0.792 | Val-Arg                       | 0.655 | GlcCer d41:1                  | 0.556 |
| PC 34:4                    | 0.792 | TG 50:2                       | 0.654 | Cer d41:1                     | 0.556 |
| PC 36:2;2O PC 18:0_18:2;2O | 0.792 | LPI 18:0                      | 0.653 | CE 18:2                       | 0.556 |
| Serine                     | 0.791 | SM 41:1;2O                    | 0.651 | citraconic acid               | 0.556 |
| SM d36:2                   | 0.790 | FA 20:3 (eicosatrienoic acid) | 0.651 | threitol                      | 0.554 |
| PE P-36:4 or PE O-36:5     | 0.788 | Creatine                      | 0.651 | FA 10:0 (capric acid)         | 0.554 |
| TG 54:5                    | 0.787 | SM d36:1.1                    | 0.651 | 1-Methyladenosine             | 0.554 |
| PC O-36:5                  | 0.787 | (R)-Butyrylcarnitine          | 0.651 | Proline-hydroxyproline        | 0.554 |
| SM d36:0.1                 | 0.786 | SM d32:1                      | 0.649 | TG 58:2 TG 16:0_18:1_24:1     | 0.553 |
| PC 37:4.1                  | 0.785 | L-Propionylcarnitine          | 0.649 | LPC 16:0                      | 0.553 |
| PI 36:4 PI 16:0_20:4       | 0.785 | PC 38:7                       | 0.647 | PC 37:2                       | 0.551 |
| DG 36:3                    | 0.783 | Proline                       | 0.647 | Cer d42:1                     | 0.551 |
| PC P-38:5 or PC O-38:6.1   | 0.783 | TG 52:2                       | 0.646 | PE P-36:2 or PE O-36:3.1      | 0.549 |
| PE P-36:4 or PE O-36:5.1   | 0.782 | serotonin                     | 0.646 | FA 20:1 (eicosenoic acid)     | 0.549 |
| threonic acid              | 0.781 | FA 24:1 (nervonic acid)       | 0.646 | lactamide                     | 0.549 |
| TG 54:4                    | 0.777 | Cer d44:1                     | 0.645 | Cer d40:1.1                   | 0.545 |
| TG 58:6                    | 0.774 | PC 31:0                       | 0.645 | Phe-Trp                       | 0.544 |
| SM d36:0                   | 0.774 | TG 48:2                       | 0.644 | 3-Cyclohexyl-1,1-dimethylurea | 0.544 |
| SM 36:2;2O SM 18:2;2O/18:0 | 0.774 | SM d43:2.1                    | 0.644 | TG 56:2                       | 0.544 |
| TG 54:6                    | 0.772 | PC 38:2.1                     | 0.644 | beta-alanine                  | 0.542 |
| Cholesterol                | 0.772 | Hexaethylene glycol           | 0.644 | Bilirubin                     | 0.541 |
| PE 38:6.1                  | 0.771 | acylcarnitine 10:1            | 0.644 | PC 28:0                       | 0.541 |
| TG 56:8                    | 0.769 | TG 47:1 TG 15:0_16:0_16:1     | 0.641 | LPC 22:6                      | 0.541 |
| Ornithine                  | 0.768 | SM d40:3                      | 0.641 | oleic acid                    | 0.540 |
| Cer d36:1.1                | 0.765 | LPC 20:2                      | 0.641 | FA 20:2 (eicosadienoic acid)  | 0.538 |
| SM d38:2.1                 | 0.763 | SM d38:0                      | 0.641 | PC 35:2.1                     | 0.538 |
| FA 22:1 (erucic acid)      | 0.762 | SM d42:3.1                    | 0.640 | Caffeine                      | 0.537 |
| PC P-40:7 or PC O-40:8     | 0.762 | Tryptophan                    | 0.640 | GlcCer d42:1                  | 0.536 |



|                              |       |                          |       |                                 |       |
|------------------------------|-------|--------------------------|-------|---------------------------------|-------|
| LPC O-16:1                   | 0.762 | Betaine                  | 0.640 | TG 51:0 TG 16:0_17:0_18:0       | 0.536 |
| PC 36:5.1                    | 0.759 | PC P-40:3 or PC O-40:4   | 0.638 | PC 35:1                         | 0.536 |
| PC 38:3.1                    | 0.759 | LPC 18:1                 | 0.638 | Citrulline                      | 0.536 |
| SM d30:1.1                   | 0.756 | SM d33:1                 | 0.638 | TG 58:3                         | 0.536 |
| PC 40:4.1                    | 0.756 | PC O-34:1                | 0.638 | PC 33:0                         | 0.535 |
| Homoarginine                 | 0.756 | 4-Guanidinobutyric acid  | 0.638 | PC 35:1.1                       | 0.535 |
| TG 52:5                      | 0.756 | LPC 18:0                 | 0.638 | LPE 22:6                        | 0.535 |
| TG 53:5                      | 0.756 | SM d38:1.1               | 0.637 | Cer d34:2                       | 0.533 |
| PC 39:6                      | 0.755 | Nudifloramide            | 0.636 | 3-Amino-1-propanol              | 0.533 |
| TG 53:4                      | 0.754 | LPC 18:2.1               | 0.636 | LPC 20:3.1                      | 0.533 |
| PC P-44:4 or PC O-44:5.1     | 0.751 | FA 22:5                  | 0.636 | LPE 18:0.1                      | 0.533 |
| Cer d40:2                    | 0.751 | Arg-Phe                  | 0.635 | PC 36:3                         | 0.533 |
| TG 51:3                      | 0.750 | PC 33:1                  | 0.635 | Didodecyl 3,3'-thiodipropionate | 0.533 |
| PC P-40:4 or PC O-40:5       | 0.749 | isocitric acid           | 0.635 | lactic acid                     | 0.533 |
| TG 53:3                      | 0.749 | Arginine                 | 0.633 | PC O-42:9                       | 0.532 |
| PC P-40:5 or PC O-40:6       | 0.749 | PC 34:3.1                | 0.633 | TG 50:0                         | 0.532 |
| TG 53:2                      | 0.749 | SM d41:2                 | 0.633 | PE 36:2 PE 18:0_18:2            | 0.532 |
| His-Val                      | 0.749 | Cer d43:1                | 0.632 | PI 34:1 PI 16:0_18:1            | 0.531 |
| LPC O-16:0                   | 0.749 | arabitol                 | 0.632 | LPE 20:4                        | 0.531 |
| PC 38:6                      | 0.749 | TG 48:4                  | 0.631 | PC 34:2                         | 0.531 |
| PI 38:3 PI 18:0_20:3         | 0.749 | PC 33:2.1                | 0.629 | LPC 22:5                        | 0.531 |
| PE P-38:5 or PE O-38:6.1     | 0.746 | PC 33:2                  | 0.629 | TG 48:0                         | 0.528 |
| Hippuric acid                | 0.746 | SM d34:2                 | 0.628 | PC 36:4;2O PC 16:0_20:4;2O      | 0.528 |
| PC 37:6                      | 0.744 | SM d40:1                 | 0.628 | Cer 18:2;2O/22:0                | 0.528 |
| PC P-42:5 or PC O-42:6       | 0.744 | Cer d33:1                | 0.628 | erythritol                      | 0.528 |
| SM d37:1                     | 0.744 | SM d34:0                 | 0.626 | HMBA                            | 0.528 |
| PC P-36:3 or PC O-36:4.1     | 0.744 | SM d33:1.1               | 0.626 | FA 18:1 (oleic acid)            | 0.528 |
| Cer d32:1                    | 0.744 | acylcarnitine 10:0       | 0.626 | Urea                            | 0.528 |
| SM d32:1.1                   | 0.741 | PC 32:2.1                | 0.626 | LPC 20:3                        | 0.527 |
| DG 34:2                      | 0.740 | LPC 20:5                 | 0.624 | GlcCer d42:2                    | 0.526 |
| L-γ-Glutamyl-L-glutamic acid | 0.740 | LPC 16:1                 | 0.622 | SM d34:1.1                      | 0.526 |
| PC P-36:4 or PC O-36:5       | 0.738 | PI 36:1 PI 18:0_18:1     | 0.621 | PE P-36:2 or PE O-36:3          | 0.526 |
| PC 37:3                      | 0.738 | acylcarnitine 18:1       | 0.621 | N-Methylproline                 | 0.526 |
| Nicotinamide                 | 0.738 | PC P-40:3 or PC O-40:4.1 | 0.618 | PC 34:0.1                       | 0.523 |
| PC O-34:5                    | 0.738 | LPC 18:2                 | 0.618 | PC 36:2.1                       | 0.523 |
| PE 38:6                      | 0.736 | oxoproline               | 0.618 | PC O-32:0                       | 0.523 |
| PC 34:4.1                    | 0.736 | 5-Aminovaleric acid      | 0.617 | FA 17:0                         | 0.523 |
| TG 50:5                      | 0.736 | Cer d40:0                | 0.615 | Cer d42:1.1                     | 0.523 |
| γ-Glutamylleucine            | 0.736 | allantoic acid           | 0.615 | FA 15:0 (pentadecylic acid)     | 0.522 |

|                            |       |                           |       |                           |       |
|----------------------------|-------|---------------------------|-------|---------------------------|-------|
| Cer d42:2.1                | 0.736 | isothreonic acid          | 0.615 | PE 34:2.1                 | 0.522 |
| Phe-Phe                    | 0.733 | LPC 14:0                  | 0.615 | CE 18:1                   | 0.521 |
| aspartic acid              | 0.733 | PC P-42:3 or PC O-42:4    | 0.614 | glyceric acid             | 0.521 |
| PE P-38:5 or PE O-38:6     | 0.733 | 5-methoxytryptamine       | 0.613 | PC 32:0.1                 | 0.521 |
| PC 34:2;2O PC 16:0_18:2;2O | 0.733 | FA 17:1                   | 0.613 | Octanoylcarnitine         | 0.521 |
| 4-Aminobenzoic acid        | 0.732 | Erucamide                 | 0.610 | acylcarnitine 16:0        | 0.521 |
| TG 52:4                    | 0.731 | Isovaleryl-L-carnitine    | 0.610 | TG 54:1                   | 0.521 |
| Cer d42:2                  | 0.728 | 3-Indolepropionic acid    | 0.608 | ribose                    | 0.521 |
| PC P-36:3 or PC O-36:4     | 0.726 | TG 54:2                   | 0.608 | 3-Hydroxybutyrylcarnitine | 0.519 |
| PC P-44:4 or PC O-44:5     | 0.726 | SM d44:2                  | 0.608 | TG 52:1                   | 0.518 |
| Cer d39:1                  | 0.726 | FA 14:1 (physeteric acid) | 0.608 | Hypoxanthine              | 0.518 |
| CE 20:4                    | 0.724 | LPC 16:1.1                | 0.608 | Carnitine                 | 0.518 |
| TG 50:4 TG 14:1_18:1_18:2  | 0.724 | PC 36:1                   | 0.608 | GlcCer d40:1              | 0.518 |
| PE 38:4.1                  | 0.723 | PC 30:0                   | 0.608 | LPC 15:0                  | 0.518 |
| PC P-42:4 or PC O-42:5     | 0.721 | PC P-32:1 or PC O-32:2    | 0.606 | biuret                    | 0.518 |
| PE 38:4                    | 0.721 | Octadecanedioic acid      | 0.605 | TG 56:1 TG 18:0_20:0_18:1 | 0.518 |
| glutamyl-valine            | 0.721 | LPE 18:2                  | 0.605 | PC 34:1.1                 | 0.518 |
| SM d32:0                   | 0.719 | acylcarnitine 18:2        | 0.605 | Cer 18:1;2O/24:0          | 0.518 |
| TG 51:2                    | 0.719 | indole-3-propionic acid   | 0.603 | acylcarnitine 18:0        | 0.517 |
| SM d36:3                   | 0.718 | LPE 18:0                  | 0.603 | PC O-32:0.1               | 0.517 |
| Ala-Leu                    | 0.715 | Choline                   | 0.603 | PC P-34:0 or PC O-34:1    | 0.515 |
| maleimide                  | 0.715 | Cer d40:1                 | 0.603 | SM d34:1                  | 0.515 |
| TG 56:4                    | 0.713 | Creatinine                | 0.603 | PC 32:1.1                 | 0.515 |
| SM d38:1                   | 0.713 | LPC 18:1.1                | 0.601 | SM d42:2                  | 0.515 |
| PC 38:4 PC 18:1_20:3       | 0.713 | His-Trp                   | 0.600 | Kynurenine                | 0.515 |
| PC P-38:3 or PC O-38:4     | 0.713 | SM d34:2.1                | 0.600 | PE P-34:1 or PE O-34:2    | 0.515 |
| PC 16:0                    | 0.713 | acylcarnitine 12:0        | 0.600 | N-Methylhistidine         | 0.515 |
| 2-hydroxybutanoic acid     | 0.712 | PI 34:2 PI 16:0_18:2      | 0.600 | TMAO                      | 0.515 |
| TG 49:2                    | 0.710 | pyruvic acid              | 0.599 | PC P-34:2 or PC O-34:3    | 0.514 |
| Gly-Val                    | 0.710 | TG 53:1                   | 0.597 | aminomalonnate            | 0.513 |
| Meprobamate                | 0.710 | Imidazole                 | 0.597 | Decanoyl-L-carnitine      | 0.513 |
| PE P-40:4 or PE O-40:5     | 0.710 | sorbitol                  | 0.596 | PC 36:3.1                 | 0.513 |
| TG 56:6                    | 0.708 | cystine                   | 0.595 | PI 36:2 PI 18:0_18:2      | 0.513 |
| PC O-44:6                  | 0.705 | 4-Acetamidobutyric acid   | 0.595 | LPE 16:0                  | 0.513 |
| PE P-38:4 or PE O-38:5     | 0.705 | FA 18:3 (linolenic acid)  | 0.595 | alpha-Methylhistidine     | 0.513 |
| TG 52:3                    | 0.703 | TG 58:1 TG 16:0_24:0_18:1 | 0.594 | LPC 17:1                  | 0.513 |
| SM d39:2                   | 0.703 | Cer d38:1.1               | 0.592 | LPC 20:4                  | 0.512 |
| cysteine                   | 0.700 | GlcCer d38:1              | 0.592 | Cer d34:0                 | 0.510 |
| asparagine                 | 0.700 | TG 48:1                   | 0.590 | PC P-34:1 or PC O-34:2    | 0.510 |

|                          |       |                           |       |                          |       |
|--------------------------|-------|---------------------------|-------|--------------------------|-------|
| SM d32:2                 | 0.697 | fructose                  | 0.590 | indole-3-lactate         | 0.510 |
| Pantothenic acid         | 0.697 | glycine                   | 0.590 | FA 18:2 (linoleic acid)  | 0.510 |
| Tyrosine                 | 0.697 | PC P-40:1 or PC O-40:2    | 0.590 | GlcCer d42:1.1           | 0.508 |
| glycolic acid            | 0.697 | PC 32:3                   | 0.590 | PC 36:2                  | 0.508 |
| TG 54:3                  | 0.697 | CE 20:3                   | 0.590 | Cer d34:1                | 0.508 |
| LPE O-16:1               | 0.697 | Phenylacetyl-L-glutamine  | 0.588 | PC P-36:2 or PC O-36:3.1 | 0.506 |
| DL-Octopamine            | 0.695 | 3-hydroxybutyric acid     | 0.588 | Cer d42:0                | 0.505 |
| Histidine                | 0.694 | Leu-Leu                   | 0.587 | TG 44:1                  | 0.505 |
| CE 16:1                  | 0.691 | linoleic acid             | 0.587 | pseudo uridine           | 0.505 |
| citric acid              | 0.690 | SM d40:0                  | 0.587 | PC 33:1.1                | 0.504 |
| TG 49:3                  | 0.688 | LPE 18:2.1                | 0.587 | L- beta -Homoserine      | 0.504 |
| PC P-34:1 or PC O-34:2.1 | 0.687 | DG 30:5                   | 0.587 | uric acid                | 0.503 |
| taurine                  | 0.687 | 3-Aminotyrosine           | 0.586 | PC P-38:2 or PC O-38:3   | 0.503 |
| PC 34:3                  | 0.687 | PC 35:2                   | 0.585 | PE 34:1                  | 0.503 |
| His-Ala                  | 0.685 | TG 50:1                   | 0.582 | TG 44:0                  | 0.503 |
| FA 20:5                  | 0.685 | TG 49:0                   | 0.582 | Glycerophosphocholine    | 0.503 |
| PC P-34:2 or PC O-34:3.1 | 0.685 | Theobromine               | 0.582 | Methacholine             | 0.503 |
| TG 50:3                  | 0.682 | TG 46:0                   | 0.581 | PC P-32:0 or PC O-32:1   | 0.503 |
| PC P-36:1 or PC O-36:2   | 0.682 | PC 38:2                   | 0.579 | Glutamic acid            | 0.503 |
| LPC 20:0                 | 0.682 | TG 47:0 TG 14:0_16:0_17:0 | 0.578 | PC 34:1                  | 0.503 |
| PC O-40:10               | 0.682 | SM d42:1.1                | 0.578 | Pyroglutamic acid        | 0.503 |
| Asp-Phe                  | 0.681 | FA 22:6                   | 0.578 | PC 18:0_20:4;3O          | 0.501 |
| p-cresol                 | 0.681 | Cer d41:1.1               | 0.578 | Cyclo(Leu-Pro)           | 0.501 |
| SM d38:2                 | 0.679 | PC 35:3                   | 0.577 | PE P-36:1 or PE O-36:2   | 0.500 |
| SM d42:3                 | 0.679 | LPC 20:4.1                | 0.577 | PC 34:0                  | 0.500 |
| FA 12:0 (lauric acid)    | 0.677 | glucose                   | 0.577 |                          |       |
